# Supplementary material
Source: publisher figshare collection journal article supplement (https://gsajournals.figshare.com/articles/dataset/_/12014826)
Supplement: Supplementary file 1 [file 2]

Supplemental Table.S3 Sumary F3

|      |                                             | F2 type |        | size (mm) |        | siphon |        | OPO    |        | 28dpf |        |          |       |      |       |                           |
|------|---------------------------------------------|---------|--------|-----------|--------|--------|--------|--------|--------|-------|--------|----------|-------|------|-------|---------------------------|
| type | F3                                          | father  | mother | father    | mother | father | mother | father | mother | egg # | FR     | larvae # | MR    | 5dpf | SR    | size (mm)                 |
| IxR  | [(I3R4)11x(I4R3)21]23x[(I3R4)11x(I4R3)21]28 | IR23    | IR28   | 27        | 35     | white  | red    | -      | -      | 61    | 0%     | 0        |       |      |       |                           |
|      | [(I3R4)11x(I4R3)21]24x[(I3R4)11x(I4R3)21]29 | IR24    | IR29   | 32        | 53     | red    | white  | +      | +      | ~100  | 15.90% | 55       | 21.8% | 12   | 2/12  | 2,1.5                     |
|      | [(I3R4)11x(I4R3)21]25x[(I3R4)11x(I4R3)21]30 | IR25    | IR30   | 60        | 45     | red    | red    | -      | -      | ~100  | 89.70% | 53       | 8.6%  | 5    | 2/5   | 1.5,7                     |
|      | [(I3R4)11x(I4R3)21]26x[(I3R4)11x(I4R3)21]31 | IR26    | IR31   | 70        | 54     | red    | red    | +      | +      | ~120  | 100%   | 135      | 26.7% | 36   | 10/36 | 1,2,3,3.5,1.5,5,4,4,2,1.5 |
|      | [(I3R4)11x(I4R3)21]27x[(I3R4)11x(I4R3)21]32 | IR27    | IR32   | 53        | 50     | white  | red    | +      | +      | 66    | 0%     | 0        |       |      |       |                           |
