# Supplementary material
Source: publisher figshare collection journal article supplement (https://gsajournals.figshare.com/articles/dataset/_/12014826)
Supplement: Supplementary file [file 2]

Supplemental Figure.1 Inland culture System

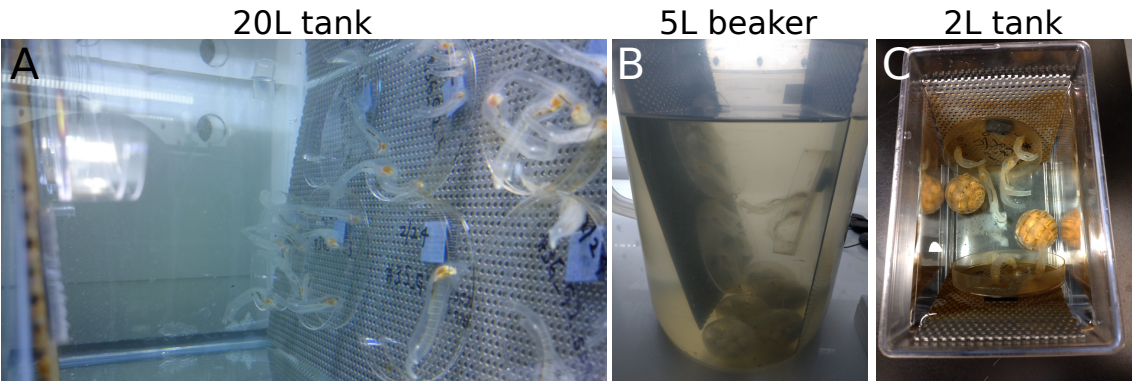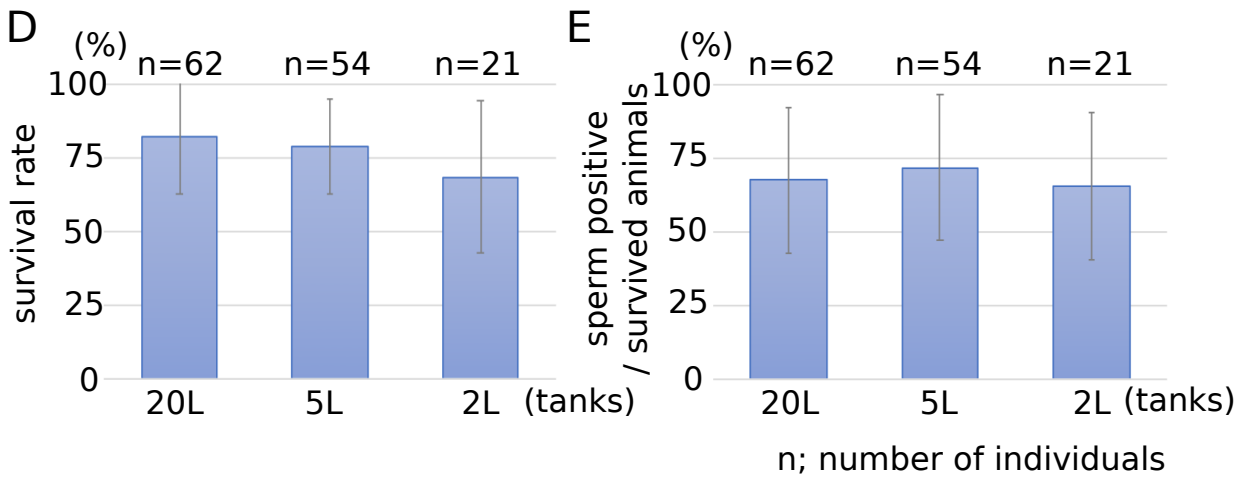

Supplemental Figure.2 M2 locus

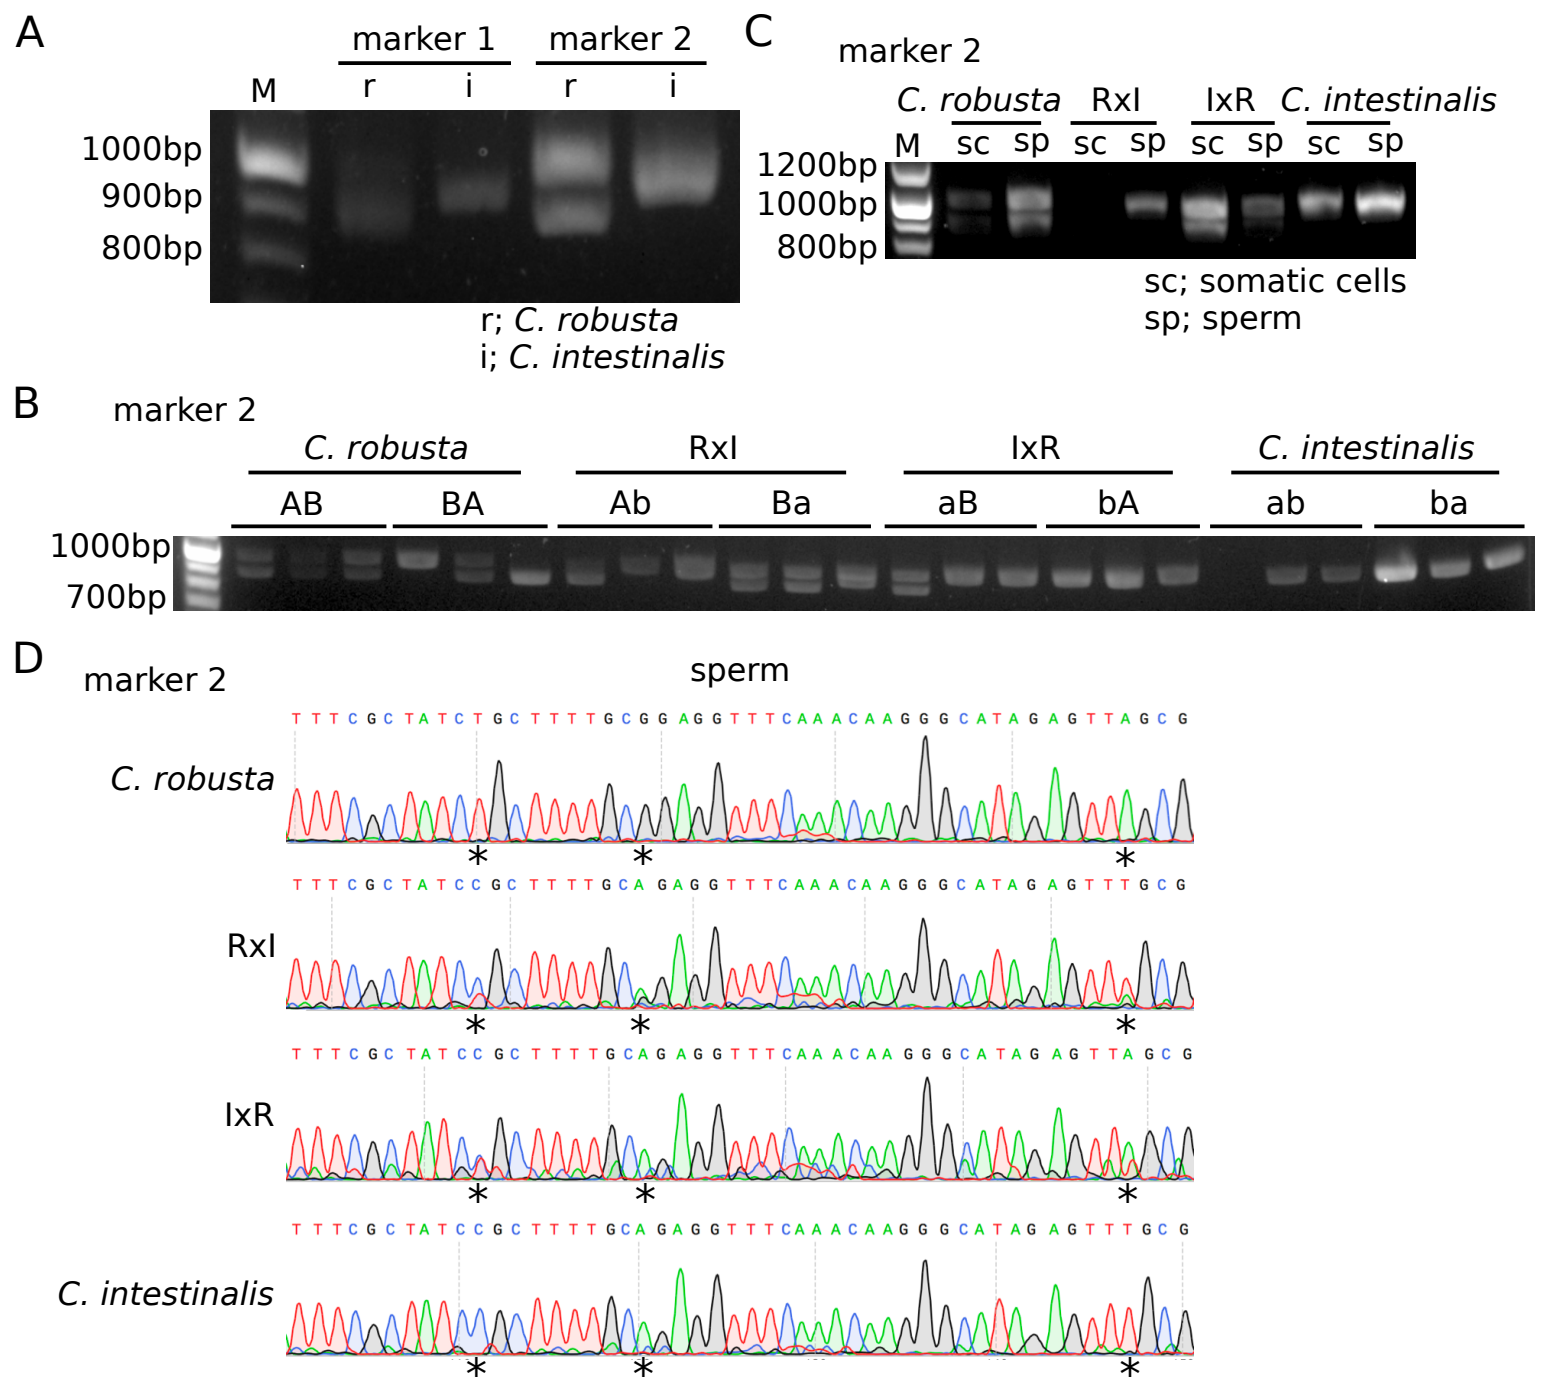

# Supplemental Figure.3 F1 genotypingMYL

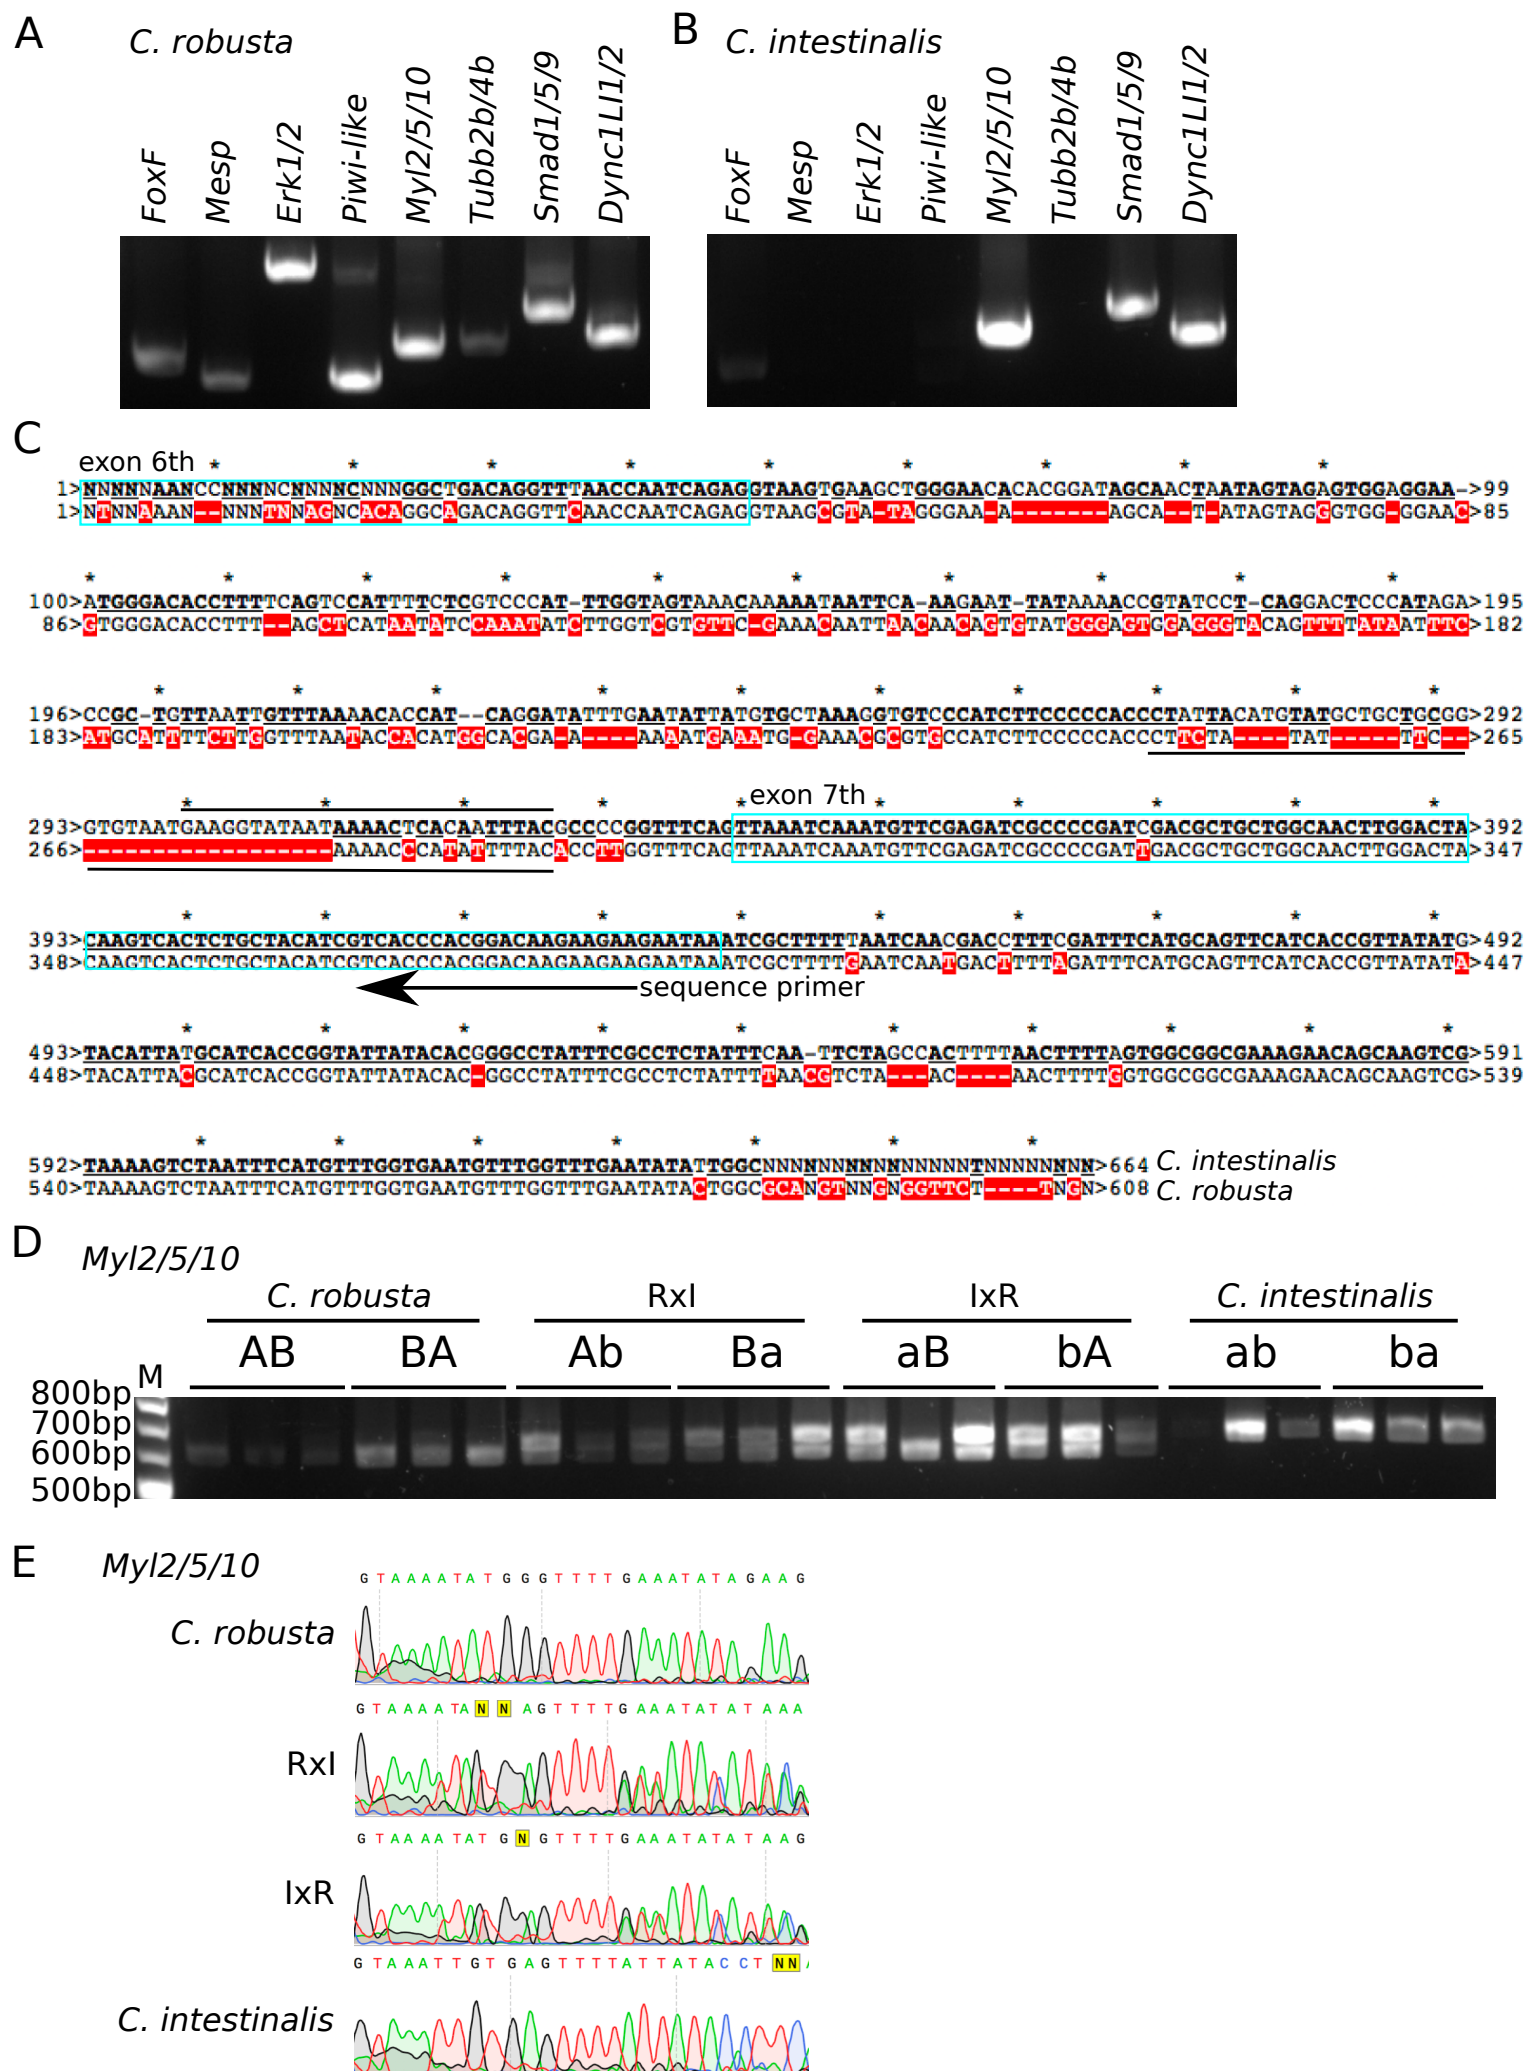

# Supplemental Table.S1 Primers

| gene name                                        | primers sequence |                              |
|--------------------------------------------------|------------------|------------------------------|
| <i>FoxF</i>                                      | Forward          | 5'-GAATTCGTCGCGCCACAATC-3'   |
|                                                  | Reverse          | 5'-AGTGGAACCTCAGCACAGT-3'    |
| <i>Mesp</i>                                      | Forward          | 5'-TGTTTTGGGGATAAATGGGGA-3'  |
|                                                  | Reverse          | 5'-GACACACATTGGTTAACGGGT-3'  |
| <i>Erk1/2</i>                                    | Forward          | 5'-CCGTTACTACACTTGTTCGCGC-3' |
|                                                  | Reverse          | 5'-ACTCATGGGCGCTTGATTT-3'    |
| <i>Piwi-like</i>                                 | Forward          | 5'-GGAACCATTCGTGTACCAGC-3'   |
|                                                  | Reverse          | 5'-GTTTCTATTGCCACCCACGG-3'   |
| <i>Myl2/5/10</i>                                 | Forward          | 5'-GAAATCCTCACGACACAGGC-3'   |
|                                                  | Reverse          | 5'-CAAGAACACAAAACCTGCGC-3'   |
|                                                  | Sequence         | 5'-TTCTTCTGTCCGTGGGTGA-3'    |
| <i>Tubb2b/4b</i>                                 | Forward          | 5'-TTGGCGAGATTTTCAGGTGC-3'   |
|                                                  | Reverse          | 5'-CCTGTGTGCATATTCCTTGGT-3'  |
| <i>Smad1/5/9</i>                                 | Forward          | 5'-GTCGATCATTTTGCCAGCT-3'    |
|                                                  | Reverse          | 5'-GGATCGGCGTGTCAAATCA-3'    |
| <i>Dync1L1/2</i>                                 | Forward          | 5'-CACCAGGAAACATGTGCAAGA-3'  |
|                                                  | Reverse          | 5'-GCGATGGACTGAAACACACA-3'   |
| Marker 1<br>(Suzuki et al., 2005, J. Mol. Evol.) | Forward          | 5'-TGATTTACTATTTTCAACG-3'    |
|                                                  | Reverse          | 5'-CTCCACTGCTAGCAACTGC-3'    |
| Marker 2<br>(Suzuki et al., 2005, J. Mol. Evol.) | Forward          | 5'-GTGTCTTAGAAGAGGAGAAT-3'   |
|                                                  | Reverse          | 5'-CTTTGTCCACTGAGAGCACT-3'   |



Supplemental Table.S2 Sumary BC2

| BC1 type | father      | mother | fertilization rate | hatched larvae | survival rate (28dpf) | (28dpf/5dpf) | size at 28dpf (mm)              |
|----------|-------------|--------|--------------------|----------------|-----------------------|--------------|---------------------------------|
| (RxI)xR  | (R2I1)2xR10 | R28    | 25%                | 1000<          | 66.7%                 | (2/3)        | 1.5,7                           |
|          |             | R29    | 100%               | 1000<          | 66.7%                 | (4/6)        | 1.5,3,4,5                       |
|          |             | R30    | 94.90%             | 1000<          | 100%                  | (3/3)        | 2.5,4,5                         |
| (IxR)xR  | (I1R2)2xR11 | R28    | 100%               | 1000<          | 91.7%                 | (11/12)      | 2.5,5,5,5.5,6,7,2.5,3.5,6,1.5,3 |
|          |             | R29    | 100%               | 1000<          | 83.3%                 | (10/12)      | 2,5.5,5,5,7,5,4.5,2,5,6.5       |
|          |             | R30    | 97.30%             | 500<           | 83.3%                 | (5/6)        | 2,1.5,7,4,1.5                   |
